# Supplementary material
Source: MDPI journal article supplement (https://www.mdpi.com/2076-3263/11/9/376)
Supplement: s1 [file s1 › geosciences-1316864-supplementary.pdf]

# The potential of tufa as a tool for paleoenvironmental research – A study of tufa from the Zrmanja River Canyon, Croatia

Jadranka Barešić <sup>1,\*</sup>, Sanja Faivre <sup>2</sup>, Andreja Sironić <sup>1</sup>, Damir Borković <sup>1</sup>, Ivanka Lovrenčić Mikelić <sup>1</sup>, Russel N. Drysdale <sup>3</sup> and Ines Krajcar Bronić <sup>1</sup>

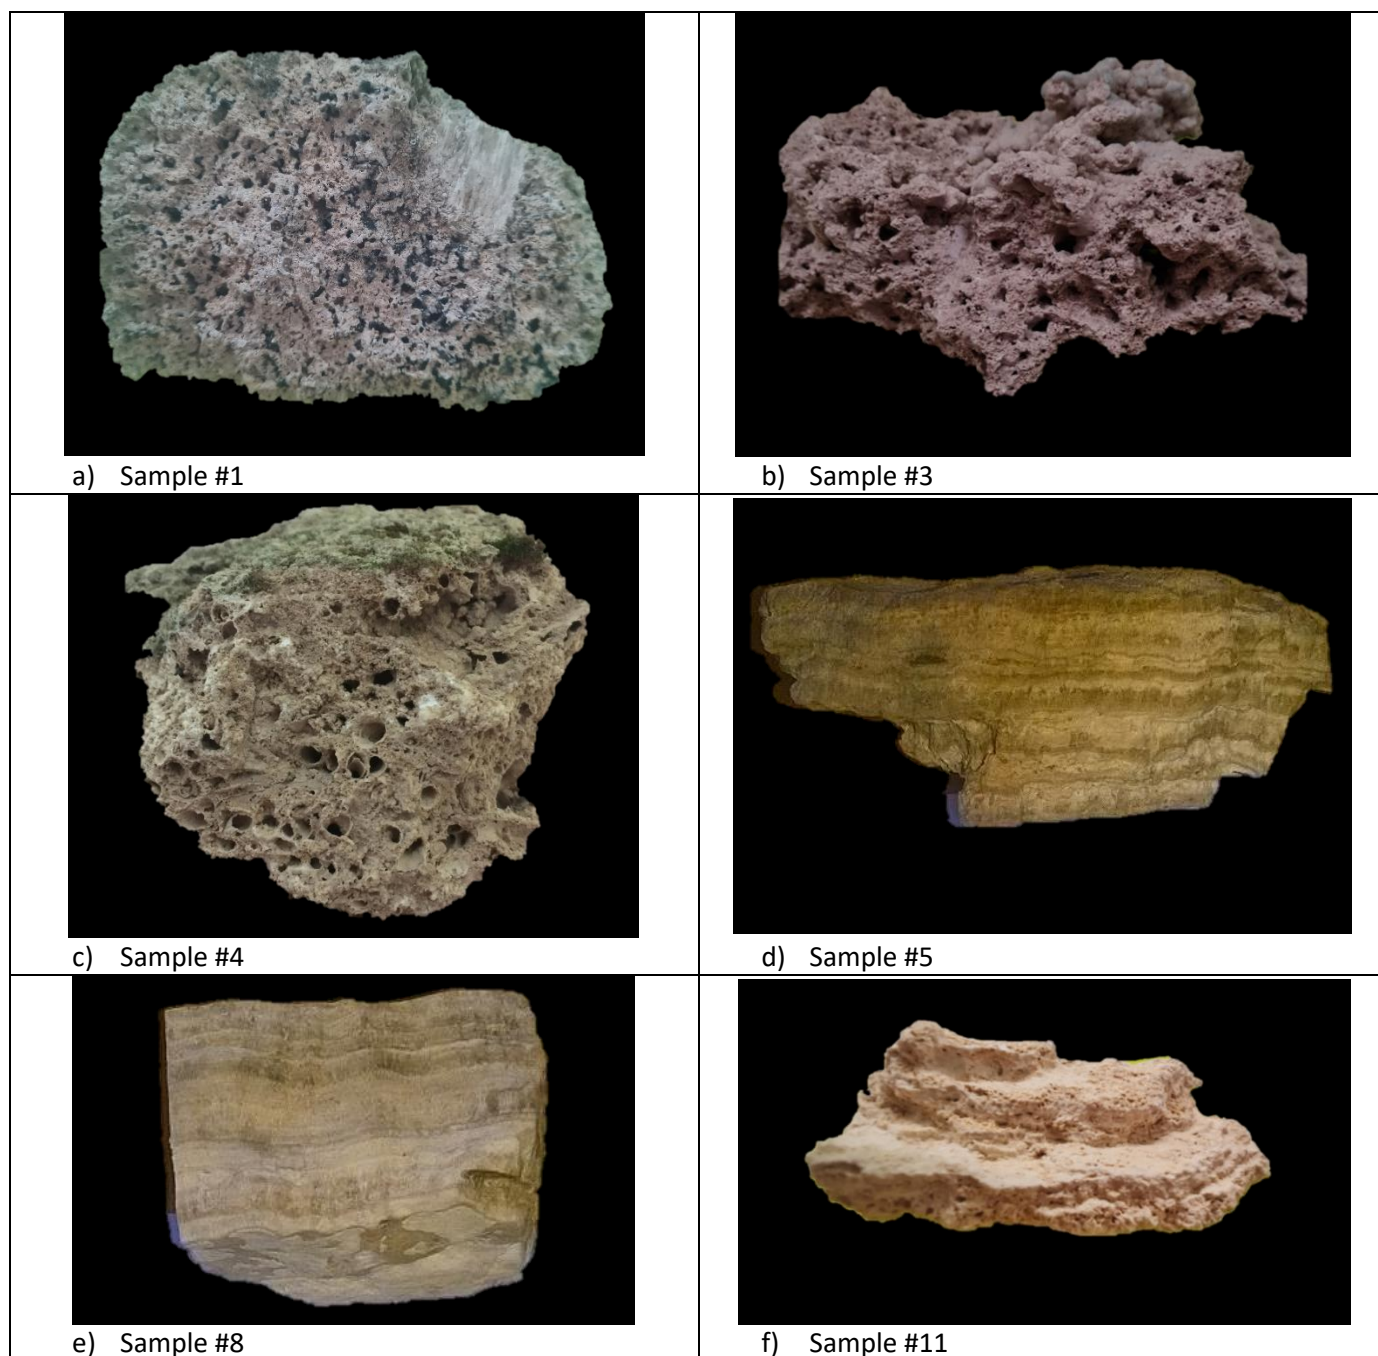

Figure S1. Characteristic tufa samples from the Zrmanja River Canyon. Sample numbers refer to Table 1.
